# Supplementary material for: Fibrosis-related miRNAs as serum biomarkers for pancreatic ductal adenocarcinoma
Source: PubMed Central journal article supplement (PMC5796986; doi:10.18632/oncotarget.23377), 2017-12-17
Supplement: oncotarget-09-4451-s001.pdf [file oncotarget-09-4451-s001.pdf]

# Fibrosis-related miRNAs as serum biomarkers for pancreatic ductal adenocarcinoma

## SUPPLEMENTARY MATERIALS

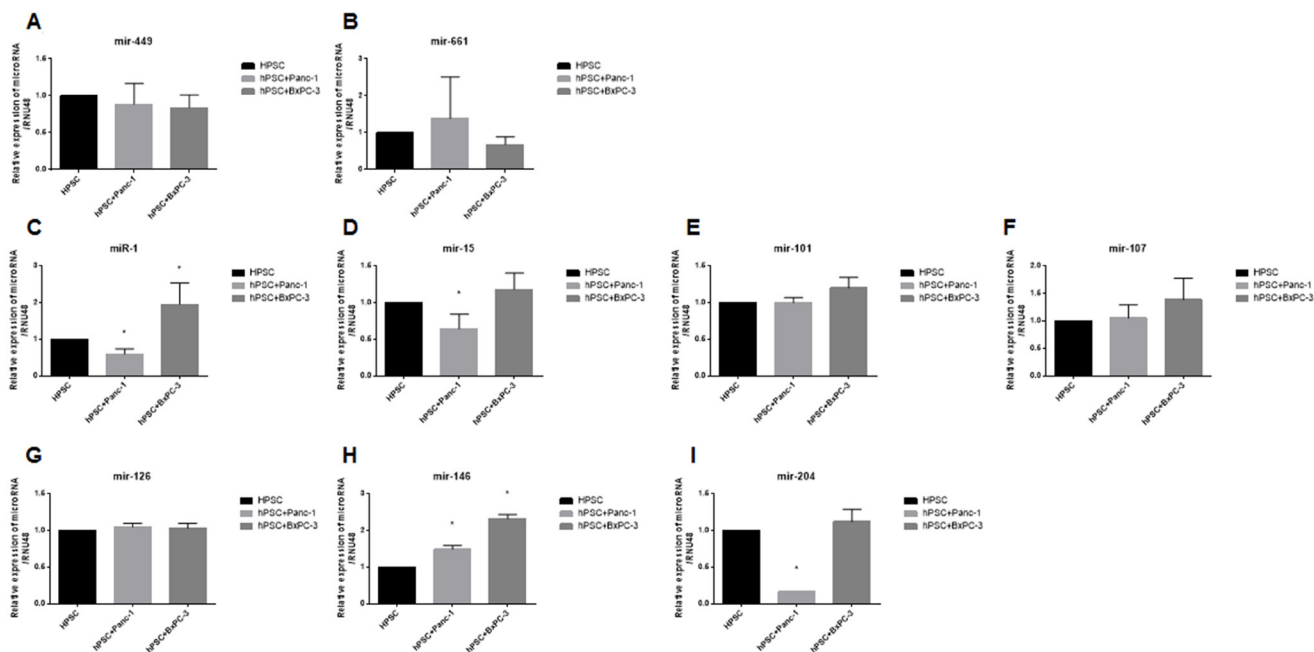

**Supplementary Figure 1: MicroRNA validation studies with Taqman probes.** The expression of each miRNA did not increase (A–B) or decrease (C–I) as observed in miRNA profiling assays. \* $P < 0.05$ .
